# Supplementary material for: Engineered CAR-T cells targeting TAG-72 and CD47 in ovarian cancer
Source: PubMed Central journal article supplement — Mol Ther Oncolytics. 2021 Jan 16;20:325–41. doi: 10.1016/j.omto.2021.01.002 (PMC7868933; doi:10.1016/j.omto.2021.01.002), 2021-01-16
Supplement: mmc1.pdf [file mmc1.pdf]

**OMTO, Volume 20**

**Supplemental Information**

**Engineered CAR-T cells targeting**

**TAG-72 and CD47 in ovarian cancer**

**Runzhe Shu, Vera J. Evtimov, Maree V. Hammett, Nhu-Y N. Nguyen, Junli Zhuang, Peter J. Hudson, Maureen C. Howard, Aleta Pupovac, Alan O. Trounson, and Richard L. Boyd**

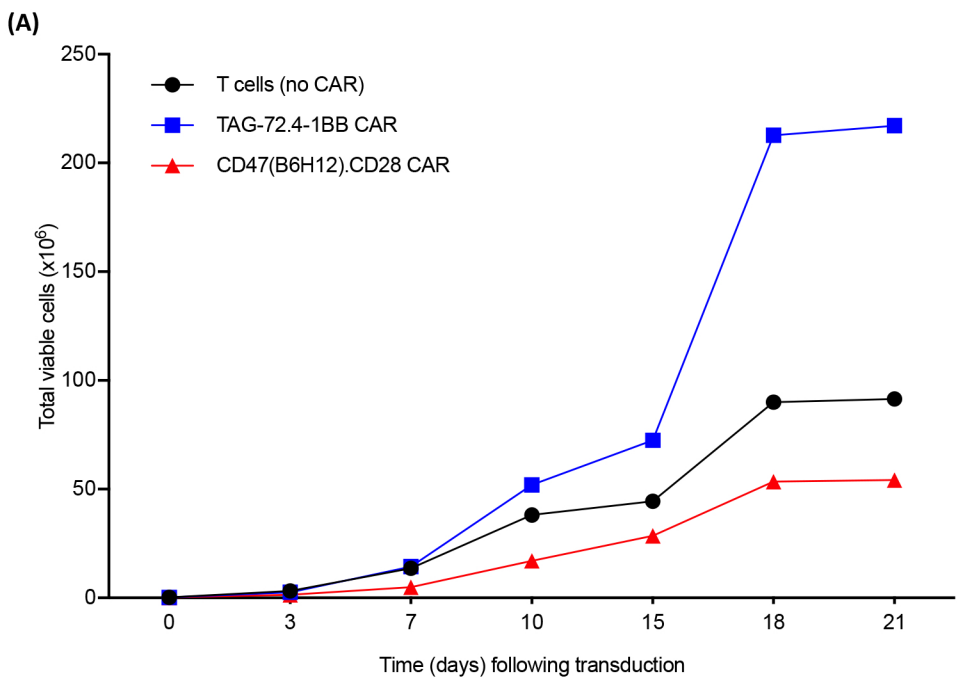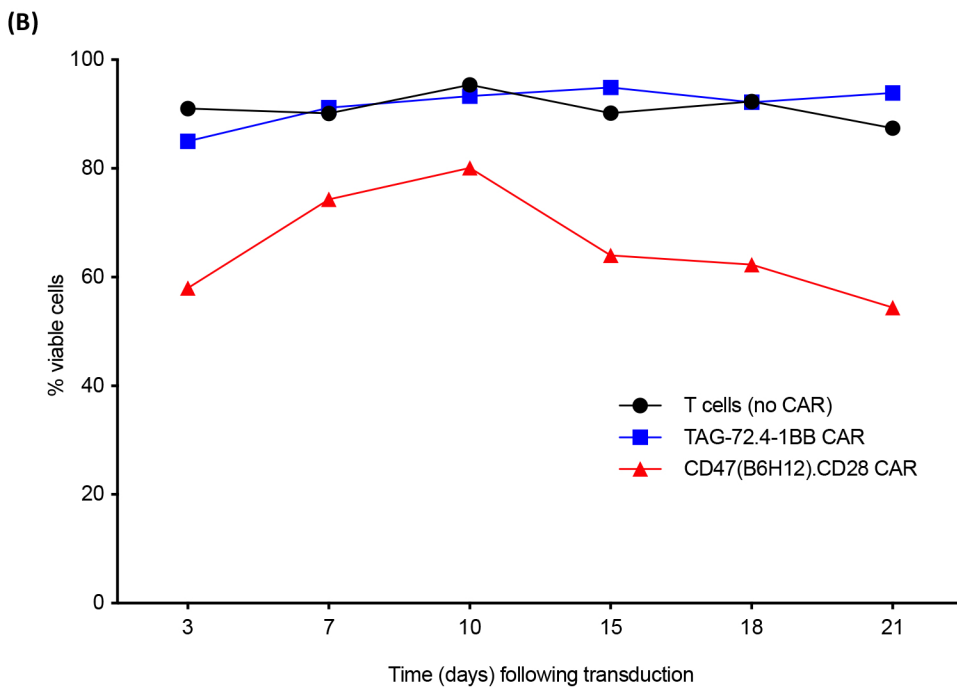

**Figure S1:** Expansion **(A)** and viability **(B)** of CD47(B6H12).CD28 CAR cells (red) compared to TAG-72.4-1BB CAR (blue) and T cells (no CAR) (black) controls.
